# Supplementary material for: Surgical Treatment of Abdominal Wall Neuromas
Source: PubMed Central journal article supplement — Plast Reconstr Surg Glob Open. 2021 May 24;9(5):e3585. doi: 10.1097/GOX.0000000000003585 (PMC8143781; doi:10.1097/gox.0000000000003585), 2021-05-24
Supplement: gox-9-e3585-s002.pdf [file gox-9-e3585-s002.pdf]

## Appendix A. Search strategy

Codes provided for Electronic Database Warehouse (EDW) analyst:

Neuroma ICD 9/10 codes:

215.9 - ICD9

d36.10 - ICD10

CPT codes:

64910 - Neuroma excision

64905 - Nerve pedicle transfer

64784 – PR excise major peripheral neuroma

64912 – PR nerve repair with nerve allograft first strand

64999 - PR Nervous system surgery unlisted

## Appendix B. Inclusion criteria

**Inclusion criteria:** Patients age 18-100, surgically treated by Dr. Dumanian at Northwestern Memorial Hospital for abdominal wall neuroma pain between 1/1/2009-1/30/20.

**Appendix C:** Flow diagram depicting patient selection process for the review and final analysis

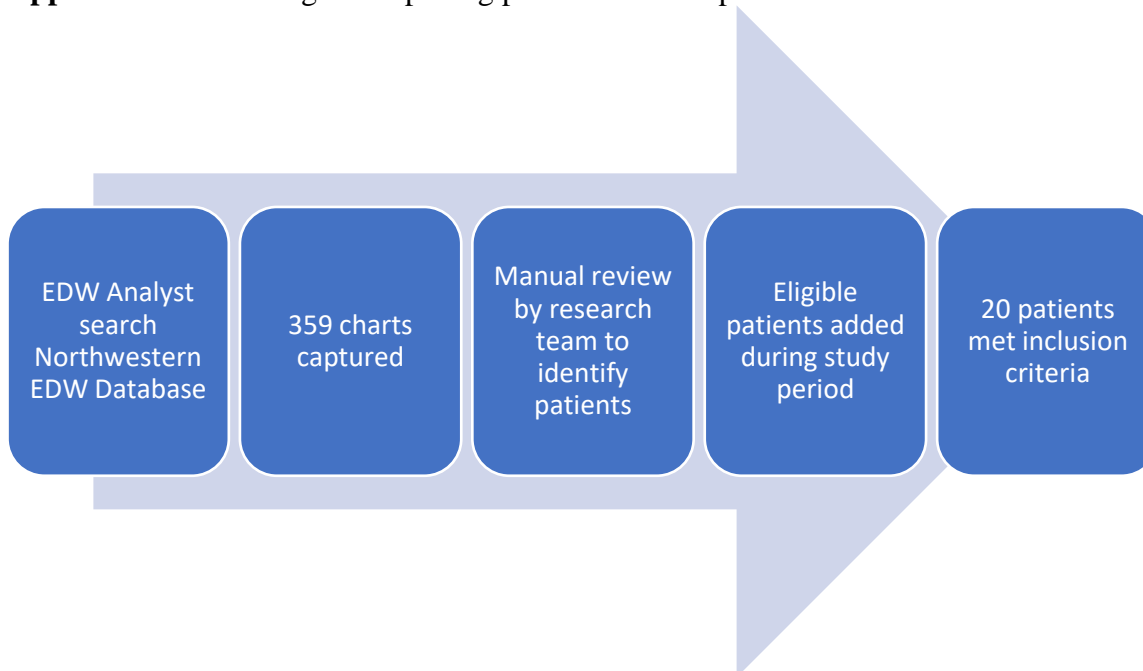

# Abdominal Wall Neuroma Pain Survey

Thank you for consenting to participate in our study! Please complete the survey below.

Thank you!

|                                                                     | 0<br>(none)           | 1                     | 2                     | 3                     | 4                     | 5                     | 6                     | 7                     | 8                     | 9                     | 10<br>(most severe)              |
|---------------------------------------------------------------------|-----------------------|-----------------------|-----------------------|-----------------------|-----------------------|-----------------------|-----------------------|-----------------------|-----------------------|-----------------------|----------------------------------|
| 1) In the past week, how severe was your WORST abdominal wall pain? | <input type="radio"/> | <input checked="" type="radio"/> |

|                                                                       | 0<br>(none)           | 1                     | 2                     | 3                     | 4                     | 5                     | 6                     | 7                     | 8                     | 9                     | 10<br>(most severe)              |
|-----------------------------------------------------------------------|-----------------------|-----------------------|-----------------------|-----------------------|-----------------------|-----------------------|-----------------------|-----------------------|-----------------------|-----------------------|----------------------------------|
| 2) In the past week, how severe was your AVERAGE abdominal wall pain? | <input type="radio"/> | <input checked="" type="radio"/> |

|                                                       | 0<br>(none)           | 1                     | 2                     | 3                     | 4                     | 5                     | 6                     | 7                     | 8                     | 9                     | 10<br>(most severe)              |
|-------------------------------------------------------|-----------------------|-----------------------|-----------------------|-----------------------|-----------------------|-----------------------|-----------------------|-----------------------|-----------------------|-----------------------|----------------------------------|
| 3) What is your current level of abdominal wall pain? | <input type="radio"/> | <input checked="" type="radio"/> |

|                                                                 | 0<br>(never)          | 1                     | 2                     | 3                     | 4                     | 5                     | 6                     | 7                     | 8                     | 9                     | 10<br>(always)        |
|-----------------------------------------------------------------|-----------------------|-----------------------|-----------------------|-----------------------|-----------------------|-----------------------|-----------------------|-----------------------|-----------------------|-----------------------|-----------------------|
| 4) In the past week, how often have you felt emotionally upset? | <input type="radio"/> |

|                                                  | 0<br>(worst)                     | 1                     | 2                     | 3                     | 4                     | 5                     | 6                     | 7                     | 8                     | 9                     | 10<br>(best)          |
|--------------------------------------------------|----------------------------------|-----------------------|-----------------------|-----------------------|-----------------------|-----------------------|-----------------------|-----------------------|-----------------------|-----------------------|-----------------------|
| 5) In the past week, how was your sleep quality? | <input checked="" type="radio"/> | <input type="radio"/> |

|                                                                                                                                       | 0<br>(none)           | 1                     | 2                     | 3                     | 4                     | 5                     | 6                     | 7                     | 8                     | 9                     | 10<br>(most severe)              |
|---------------------------------------------------------------------------------------------------------------------------------------|-----------------------|-----------------------|-----------------------|-----------------------|-----------------------|-----------------------|-----------------------|-----------------------|-----------------------|-----------------------|----------------------------------|
| 6) How much does your abdominal wall pain interfere with your ability to do the physical activities of daily living and of enjoyment? | <input type="radio"/> | <input checked="" type="radio"/> |

7) Please enter the medication name, dosage, and times/day of each medication you are taking for abdominal wall pain.

Enter "None" if you are not taking any medications for abdominal wall pain.

---

8) Which of the following best describes your current occupation status?

- Working full time (including full-time student or running the home)
- Working part time
- Retired
- Retraining for alternative employment or looking for work
- Unable to work
